# Supplementary material
Source: ML conference proceedings conference paper supplement (https://openaccess.thecvf.com/content/CVPR2025/html/Fang_DistinctAD_Distinctive_Audio_CVPR_2025_paper.html)
Supplement: Supplementary file 1 [file Fang_DistinctAD_Distinctive_Audio_CVPR_2025_supplemental.pdf]

# DistinctAD: Distinctive Audio Description Generation in Contexts

## Supplementary Material

### A. Analysis of AD Reconstruction with CLIP Embedding Space

As detailed in the main paper’s §3.1, our Stage-I strategy, **CLIP-AD adaption**, is inspired by a preliminary AD reconstruction experiment using the CLIP text encoder and GPT-2. We begin with the question: *is the CLIP text embedding space expressive enough for embedded AD words to be reconstructed by LLMs?* If the reconstruction process is successful—meaning that LLMs can understand the textual ADs encoded by the CLIP text encoder—then the misalignment in the VLM joint feature space likely occurs because of the CLIP vision encoder, rather than between the CLIP text encoder and the LLMs. On the other hand, if the reconstruction is not successful, then the pre-trained CLIP joint embedding space is not suitable for the AD task, and both text and vision encoders need to be retrained.

To address this question, we design the AD words reconstruction pipeline illustrated in Fig. A.1. Specifically, we input the AD sentence into a frozen CLIP text encoder, modified to output tokens for each word. We implement two versions of AD reconstruction: 1) using **only a single [CLS] vector**, or 2) using **all word tokens** as prompts. We append a <BOS> tag to signal the start of reconstruction. The output embeddings are then fed into a learnable single-layer projector, transforming the CLIP word tokens into the LLM embedding space. We apply an auto-regression loss identical to (11) in the main paper, with the visual prompt setting as none. The projector is trained for 10 epochs on MAD-v2-Named [68] ADs, and the performance is evaluated using classical n-gram based metrics on the MAD-Eval benchmark [21]. The reconstruction results are presented in Tab. A.1. Remarkably, by merely fine-tuning a single-layer projector, AD reconstruction achieves results closely aligned with the ground truth, such as scores of **80.8** on **BLEU1** and **612.5** on **CIDEr** with all words input. Additionally, using only a single [CLS] vector to recover the entire AD achieves 92.2 on CIDEr, *significantly* outperforming existing AD works, which score  $\sim 20$  CIDEr. This shows that AD words (or [CLS] vector) encoded by the CLIP text encoder can be effectively understood by LLMs, suggesting that the misalignment mainly lies within the joint VLM feature space, *i.e.*, discrepancies between CLIP vision embeddings and CLIP AD embeddings.

### B. Analysis of Contextual Features

In this section, we validate our primary hypothesis: *sequential clips from an extended video often share redundant scenes or characters, resulting in similar visual fea-*

*tures within contexts*, as discussed in §3.2 of the main paper. Fig. B.2 presents the cosine similarity matrix for neighboring (contextual) movie clips (left) and their corresponding audio descriptions (ADs) (right) from four randomly selected films. The visual clip features are derived through mean pooling over  $T$  frame embeddings encoded by the CLIP Vision encoder, while the AD features are obtained from the [CLS] embeddings encoded by the CLIP Text encoder. From these similarity matrices, we observe two key points: (i) Movie clips generally exhibit greater similarity to each other compared to ADs, indicated by a higher proportion of red (deep) colors; (ii) Compared to ADs, neighboring (contextual) movie clips show prominent areas of similarity around the diagonals (*i.e.*, the block diagonal structure), demonstrating that they share similar visual features due to recurring scenes and characters.

In Fig. B.2, middle column, we illustrate the similarity of neighboring movie clips using our adapted  $\text{CLIP}_{\text{AD}}$  vision encoder in Stage-I (see §3.1 of the main paper). Significant changes compared to *vanilla CLIP* visualizations are highlighted with **green** rectangles. Our  $\text{CLIP}_{\text{AD}}$  helps reduce redundancy among neighboring video clips, as evidenced by the smaller similarity values within the green rectangles, which helps to improve the generation of distinctive ADs in our framework. This further demonstrates the effectiveness of our Stage-I strategy.

### C. Detailed Formulation of CrossAttention

In this part, we provide an in-depth explanation of the Cross-Attention formulation, building upon (9) in the main paper. The query  $Q$  originates from the Perceiver output, denoted as  $\mathcal{H}$ , while both the key  $K$  and the value  $V$  are derived from the base matrix  $\mathcal{M}$ . We apply three Linear layers to transform the query, key, and value into a unified embedding space, as represented by the following equations:

$$Q = \mathcal{H}W_Q^T + b_Q, \quad (13)$$

$$K = \mathcal{M}W_K^T + b_K, \quad (14)$$

$$V = \mathcal{M}W_V^T + b_V. \quad (15)$$

Subsequently, the cross-attention mechanism is formulated by computing a weighted sum of the values, where the weights are determined by the similarity between the queries and keys. The softmax function ensures the normalization of the attention weights. The final cross-attention output  $\tilde{\mathcal{H}}$  is given by:

$$\tilde{\mathcal{H}} = \text{Softmax}\left(\frac{QK^T}{\sqrt{d_k}}\right)V, \quad (16)$$

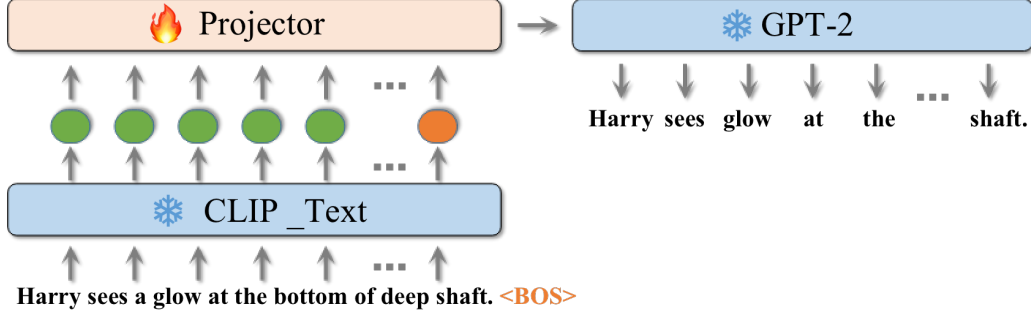

Figure A.1. Reconstructing AD words by merely fine-tuning a single-layer projector between a frozen CLIP text encoder and GPT-2.

| Projector input | (V)LM     | LLM   | BLEU1 | BLEU2 | BLEU3 | BLEU4 | METEOR | ROUGE-L | CIDEr | SPICE |
|-----------------|-----------|-------|-------|-------|-------|-------|--------|---------|-------|-------|
| [CLS]           | CLIP-Text | GPT-2 | 29.3  | 16.4  | 9.2   | 5.1   | 13.2   | 29.4    | 92.2  | 19.4  |
| Words           | CLIP-Text | GPT-2 | 80.8  | 74.4  | 68.4  | 63.0  | 47.4   | 82.4    | 612.5 | 66.4  |

Table A.1. AD reconstruction results on MAD-Eval benchmark. Only textual modality ADs in MAD-Eval are utilized for evaluation, with no movie frames involved. [CLS] denotes using only **one** class token vector to reconstruct the entire AD.

| Ex# | $\alpha\hat{\mathcal{H}}$ | $\beta\hat{\mathcal{H}}$ | $\mathcal{L}_{dist}$ | CIDEr       | R@5/16      |
|-----|---------------------------|--------------------------|----------------------|-------------|-------------|
| A0  | $\times$                  | $\times$                 | $\times$             | 25.2        | 52.3        |
| B1  | $\checkmark$              | $\times$                 | $\times$             | 26.1        | 54.1        |
| B2  | $\times$                  | $\checkmark$             | $\times$             | 26.4        | 54.5        |
| B3  | $\checkmark$              | $\checkmark$             | $\times$             | 26.0        | 55.5        |
| C0  | $\times$                  | $\times$                 | $\checkmark$         | 27.0        | 55.9        |
| C1  | $\checkmark$              | $\times$                 | $\checkmark$         | 26.8        | 55.7        |
| C2  | $\times$                  | $\checkmark$             | $\checkmark$         | 27.2        | 55.9        |
| C3  | $\checkmark$              | $\checkmark$             | $\checkmark$         | <b>27.3</b> | <b>56.0</b> |

Table D.2. Ablation studies with LLaMA3-8B in Stage-II.

where  $\sqrt{d_k}$  acts as a scaling factor to stabilize the gradient flow during training.

## D. Ablations with Strongest Settings

As a complement to the ablation study in Tab. 5 in the main paper, we further conduct Stage-II ablations using our strongest settings, *i.e.* CLIP-AD-B16 and LLaMA3-8B models. As shown in Tab. D.2, the performance remains generally consistent, leading to similar conclusions as those obtained with default CLIP-AD-B32 and GPT-2 settings.

## E. Additional Qualitative Examples

Following Fig. 5 in the main paper, we present additional qualitative examples in Fig. E.4, utilizing our adapted CLIP-AD-B16 [58] in Stage-I and LLM LLaMA3-8B [4]. The movie clips are **consecutively** sampled from the following films: **(a)** *Signs* (2002), **(b)** *The Roommate* (2011), and **(c)** *How Do You Know* (2010), listed from top to bottom. For accurate retrieval and alignment, the starting time of each movie clip is indicated in the top-left corner of each clip. Additionally, we provide results from the publicly

available AutoAD-Zero [82] for comparison. The numerous high-quality examples further demonstrate the superiority of our proposed method, DistinctAD.

Since complete predictions and codes are *unavailable* for many previous methods, such as AutoAD-I, AutoAD-II, AutoAD-III, and MM-Narrator, we only collect the qualitative examples presented in their original papers and perform qualitative comparisons in Fig. E.3. Training-free methods are highlighted with a blue background, while partial-fine-tuning methods are marked in orange. It is evident that training-free methods utilizing proprietary models like GPT-4 or GPT-4V often encounter hallucination issues, producing irrelevant or imaginary details. In contrast, partial-fine-tuning methods, *i.e.* AutoAD-I, AutoAD-II and DistinctAD, generate more accurate ADs close to human-annotated ground-truth. (We use past 3 *ground-truth* ADs as AutoAD-I’s textual prompts.) Despite this, AutoAD-I can be negatively influenced by its contextual content, *e.g.* “nuns” mistakenly appears in **(d)**. AutoAD-II tends to generate similar AD words, *e.g.* “furrowed brow” for movie frames with close-up faces in **(a)** and **(d)**, whereas our DistinctAD is generally more distinctive.

## F. Raw Frames of MAD

Due to copyright restrictions, MAD [68] only provides frame-level movie features extracted by CLIP [58]. However, to facilitate CLIP-AD adaptation in Stage-I, we require raw MAD movie frames to fine-tune the CLIP vision encoder. To achieve this, we collect MAD raw movies from third-party platforms such as Amazon Prime Video. Out of the 488 movies in the MAD-train list, 3 are not available online, as shown in Tab. F.2.

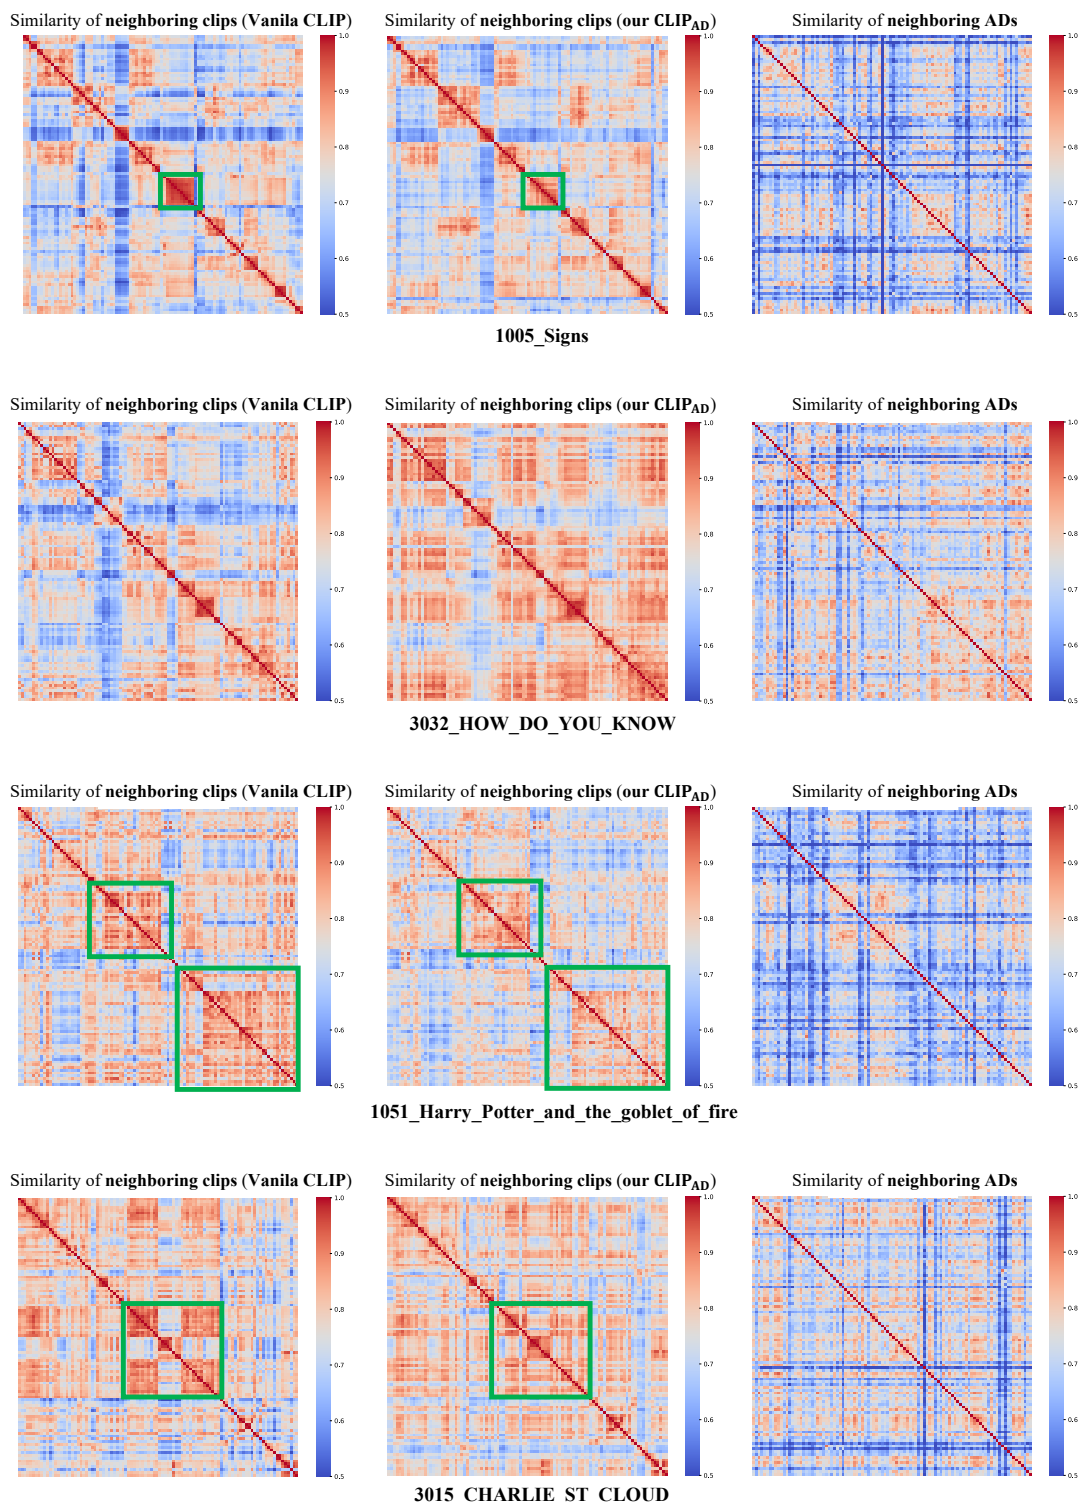

Figure B.2. Cosine similarity matrices of neighboring (contextual) movie clips using vanilla CLIP (left) and our adapted CLIP<sub>AD</sub> in Stage-I (middle). We also show similarity matrices of corresponding neighboring ADs (right). Movie clips are from Signs (2002), How Do You Know (2010), Harry Potter and the Goblet of Fire (2005), and Charlie St. Cloud (2010). Green boxes indicate differences between vanilla CLIP and our CLIP-AD. Zoom in for details.

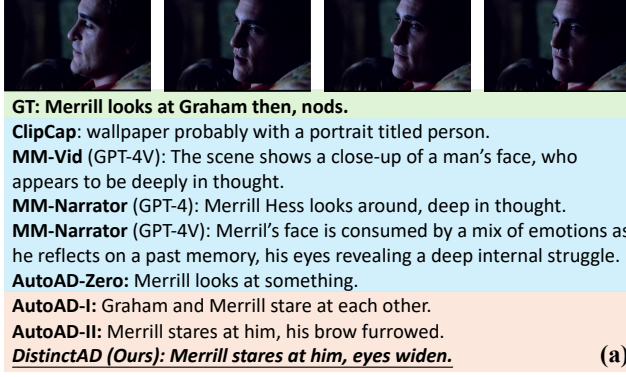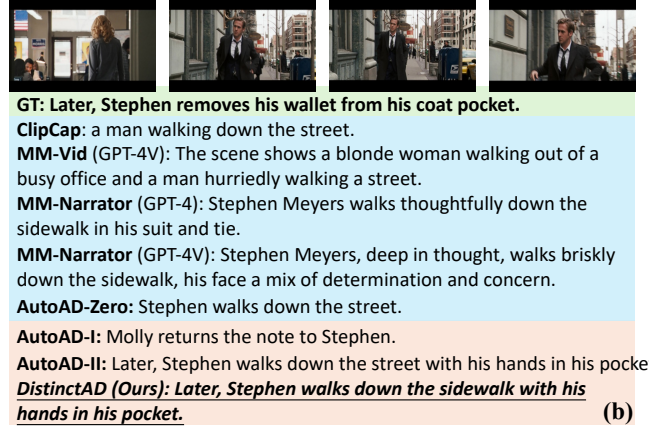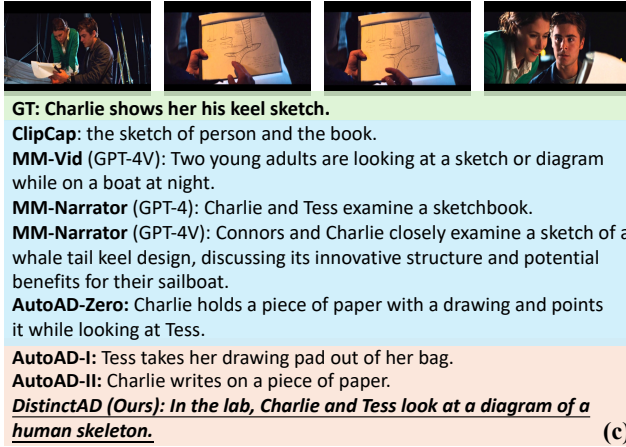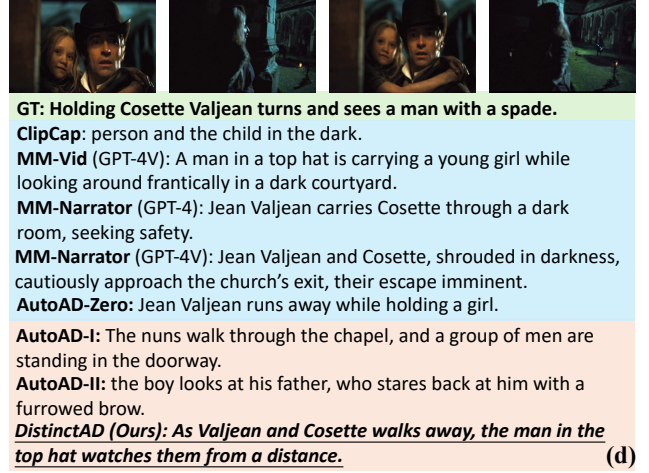

Figure E.3. Qualitative comparisons on **single** movie clips between ClipCap, MM-Vid, MM-Narrator, AutoAD-Zero, AutoAD-I, AutoAD-II, and our DistinctAD. The movies are from (a) Signs (2002), (b) Ides of March (2011), (c) Charlie St. Cloud (2010), and (d) Les Misérables (2012). Zoom in for details.

| MAD.ID | IMDB.ID   | Movie Title                    |
|--------|-----------|--------------------------------|
| 4797   | tt0395571 | <i>Holy Flying Circus</i>      |
| 4839   | tt4846340 | <i>Halo: The Fall of Reach</i> |
| 5900   | tt0408306 | <i>Murdered by My Father</i>   |

Table F.2. Meta information of missing films in MAD-train.

Moreover, due to geographical differences, we may download different versions of movies, potentially leading to mismatches between movie clips and annotated timestamps. To address this, we conduct a thorough check by comparing our downloaded movies with the MAD dataset and their metadata in the IMDB database. Out of 488 movies, 9 have time durations that vary more than one minute. Details are shown in Tab. F.3.

According to the statistical information in Tab. F.3, we identify potential temporal misalignment noise in the existing MAD benchmark. To mitigate negative impacts during training, we exclude movies with durations that significantly differ from those in the IMDB database. The removed movie IDs are: 4017, 4902, 5634. A

| MAD.ID | IMDB.ID   | MAD.Time   | Our.Time   | IMDB.Time |
|--------|-----------|------------|------------|-----------|
| 2738   | tt0450232 | 1h 37m 26s | 1h 41m 59s | 1h 42m    |
| 2787   | tt1136608 | 1h 19m 24s | 1h 52m 16s | 1h 52m    |
| 4017   | tt5463162 | 1h 59m 20s | 1h 57m 41s | 1h 59m    |
| 4061   | tt1837636 | 1h 28m 2s  | 2h 8m 12s  | 2h 8m     |
| 4266   | tt0375735 | 1h 36m 8s  | 1h 40m 39s | 1h 40m    |
| 4772   | tt0424136 | 1h 39m 53s | 1h 44m 33s | 1h 44m    |
| 4902   | tt0119310 | 1h 15m 30s | 1h 11m 55s | 1h 14m    |
| 5634   | tt2929690 | 1h 40m 52s | 1h 51m 50s | 1h 40m    |
| 6952   | tt2527338 | 2h 31m 52s | 2h 21m 53s | 2h 21m    |

Table F.3. Metadata for movies with duration difference exceeding 1 minute. Durations closer to the IMDB are highlighted in green.

| MAD-v2-Named            | # movies | # AD    |
|-------------------------|----------|---------|
| MAD-Train-Features [68] | 488      | 334,296 |
| MAD-Train-Frames (Ours) | 482      | 326,632 |

Table F.4. Statistics of our refined MAD dataset with raw frames.

summary of the final employed MAD-v2-Named training dataset is provided in Tab. F.4.



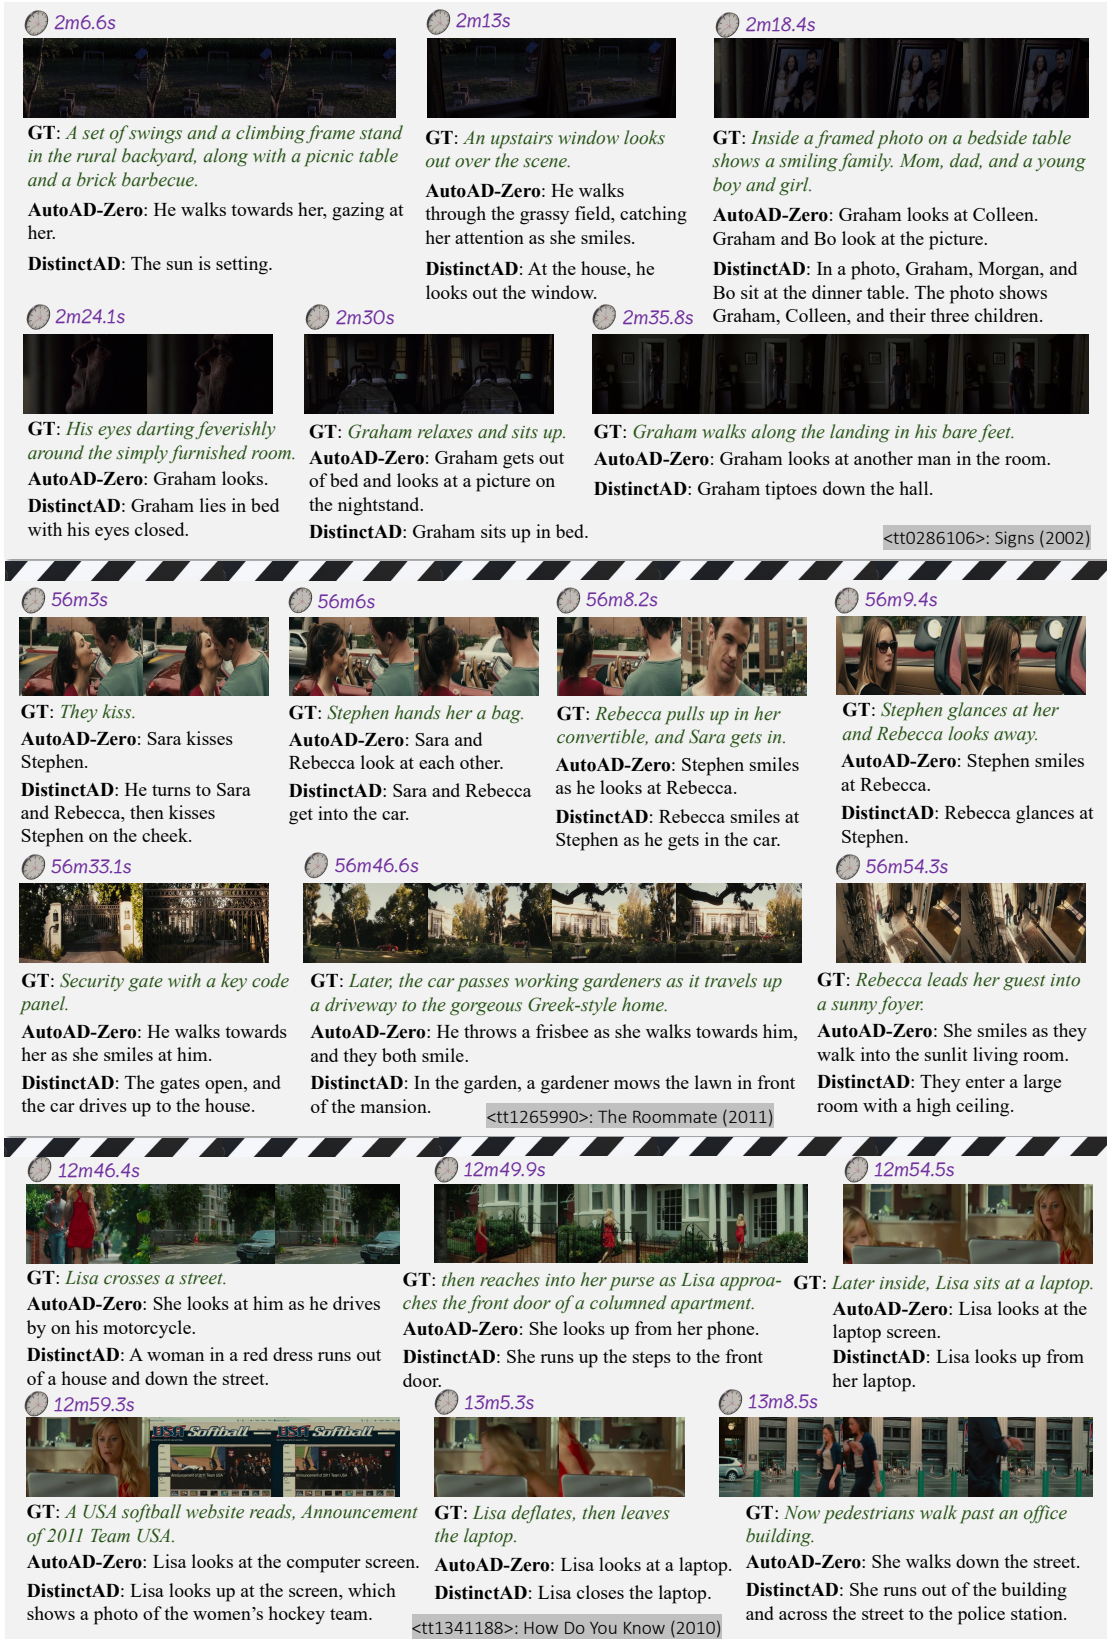

Figure E.4. More qualitative results on **consecutive** movie clips. Movie frames from top to bottom are taken from Signs (2002), The Roommate (2011), How Do You Know (2010), respectively. Zoom in for details.
